# Supplementary material
Source: HighWire-hosted journal article supplement (https://jnm.snmjournals.org/highwire/filestream/94462/field_highwire_adjunct_files/0/119891_Supplemental_Data.pdf)
Supplement: 119891_Supplemental_Data.pdf [file 119891_Supplemental_Data.pdf]

Supplemental Table 1. Normalized number of disintegrations calculated from whole-body  $^{11}\text{C}$ -ITMM PET in human subjects

| Organ                    | Normalized number of disintegrations (MBq-h/MBq administered) |
|--------------------------|---------------------------------------------------------------|
| Adrenals                 | $2.7\text{E-}04 \pm 1.3\text{E-}04$ (1.2E-04 – 3.5E-04)       |
| Brain                    | $1.4\text{E-}02 \pm 3.7\text{E-}03$ (1.1E-02 – 1.8E-02)       |
| Gallbladder contents     | $1.9\text{E-}03 \pm 6.8\text{E-}04$ (1.3E-03 – 2.6E-03)       |
| Small intestine          | $2.4\text{E-}02 \pm 5.5\text{E-}03$ (1.8E-02 – 2.8E-02)       |
| Stomach                  | $1.0\text{E-}02 \pm 5.5\text{E-}03$ (7.1E-03 – 1.7E-02)       |
| Heart wall               | $8.3\text{E-}03 \pm 1.4\text{E-}03$ (6.7E-03 – 9.3E-03)       |
| Kidneys                  | $3.8\text{E-}03 \pm 2.2\text{E-}03$ (1.5E-03 – 6.0E-03)       |
| Liver                    | $4.8\text{E-}02 \pm 1.2\text{E-}02$ (4.0E-02 – 6.2E-02)       |
| Lungs                    | $1.1\text{E-}02 \pm 1.4\text{E-}03$ (9.4E-03 – 1.2E-02)       |
| Pancreas                 | $5.3\text{E-}04 \pm 1.5\text{E-}04$ (3.5E-04 – 6.5E-04)       |
| Red marrow               | $1.2\text{E-}02 \pm 6.7\text{E-}04$ (1.1E-02 – 1.2E-02)       |
| Spleen                   | $4.4\text{E-}04 \pm 1.6\text{E-}04$ (2.9E-04 – 6.0E-04)       |
| Thymus                   | $2.2\text{E-}04 \pm 7.3\text{E-}05$ (1.7E-04 – 3.1E-04)       |
| Thyroid                  | $2.0\text{E-}04 \pm 3.8\text{E-}05$ (1.6E-04 – 2.4E-04)       |
| Urinary bladder contents | $1.6\text{E-}02 \pm 5.3\text{E-}03$ (1.3E-02 – 2.2E-02)       |
| Remainder                | $3.4\text{E-}01 \pm 1.7\text{E-}02$ (3.2E-01 – 3.5E-01)       |

Data are means  $\pm$  SD (range) and the range for healthy male subjects ( $n = 3$ ).
